# Supplementary material for: Enhancement of the thermoelectric properties of Zintl phase SrMg2Bi2 by Na-doping
Source: Royal Society of Chemistry journal article supplement (doi:10.1039/d1dt03704h), 2021-12-17
Supplement: d1dt03704h1.pdf [file d1dt03704h1.pdf]

## Enhancement of thermoelectric properties of Zintl phase SrMg<sub>2</sub>Bi<sub>2</sub> by Na-doping

Fang Yu<sup>a</sup>, Xiang Meng<sup>b,\*</sup>, Lu Li<sup>b</sup>, and Cuilian Wen<sup>c,\*\*</sup>

<sup>a</sup>Institute of Logistics Science and Engineering, Shanghai Maritime University, Shanghai 201306,  
China.

<sup>b</sup>School of Material Science and Engineering, Chongqing University of Arts and Sciences, Chongqing  
402160, China

<sup>c</sup>College of Materials Science and Engineering, Fuzhou University, Xueyuan Road, Fuzhou 350108,  
China

\*Email: xiang.meng@hotmail.com (X. Meng); clwen@fzu.edu.cn (C. Wen)

The single parabolic band (SPB) model:

The Seebeck coefficient:

$$S(\eta) = \frac{k_B}{e} \left[ \frac{(r + 5/2)F_{(r+3/2)}(\eta)}{(r + 3/2)F_{(r+1/2)}(\eta)} - \eta \right]$$

The Hall carrier concentration:

$$n_H = \frac{1}{eR_H} = \frac{(2m^* k_B T)^{3/2} (r + 3/2)^2 F_{(r+1/2)}(\eta)}{3\pi^2 \hbar^3 (2r + 3/2) F_{(2r+1/2)}(\eta)}$$

The Hall mobility:

$$\mu_H = \left[ \frac{e\pi\hbar^4 C_1}{\sqrt{2}(k_B T)^{3/2} m_b^{*3/2} m_l^* E_{def}^2} \right] \frac{(2r + 3/2) F_{(2r+1/2)}(\eta)}{\left(r + \frac{3}{2}\right)^2 F_{(r+1/2)}(\eta)}$$

Lorenz Factor:

$$L = \left(\frac{k_B}{e}\right)^2 \left\{ \frac{(r + 7/2)F_{(r+5/2)}(\eta)}{(r + 3/2)F_{(r+3/2)}(\eta)} - \left[ \frac{(r + 5/2)F_{(r+3/2)}(\eta)}{(r + 3/2)F_{(r+1/2)}(\eta)} \right]^2 \right\}$$

Where  $F_j(\eta) = \int_0^\infty \frac{\xi^j d\xi}{1 + \exp\left(\frac{\xi}{k_B T} - \eta\right)}$  is the Fermi integral,  $m^* = \frac{\hbar^2}{2k_B T} \left[ \frac{n \times r_H}{4\pi F_{1/2}(\eta)} \right]^{2/3}$  is the density-of-states effective mass.

In the above equations,  $k_B$  is the Boltzmann constant,  $\hbar$  is the reduced Plank constant,  $C_l$  is the elastic constant for longitudinal vibrations,  $E_{def}$  is the deformation potential coefficient characterizing the strength of carriers scattered by acoustic phonons,  $m_l^*$  is the inertial effective mass,  $m_b^*$  is the band effective mass and  $\eta$  is the reduced Fermi level. When charge carriers are scattered by the acoustic phonons,  $r = -1/2$ .

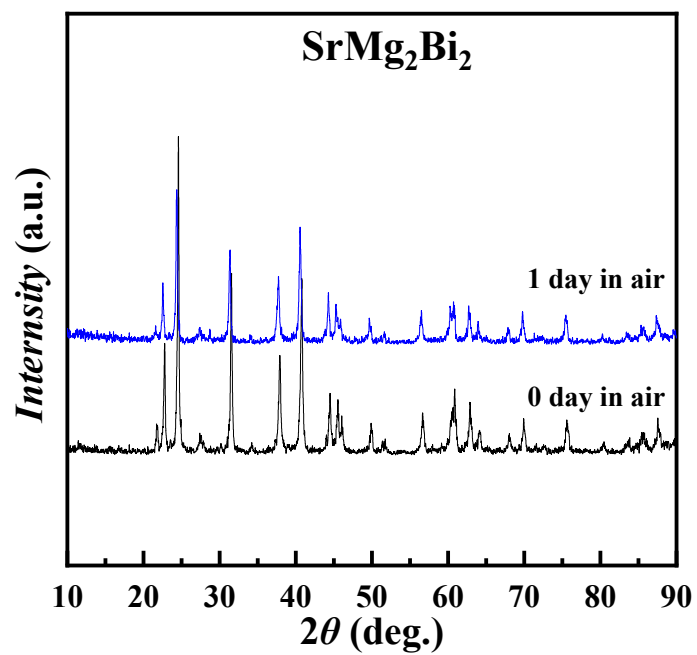

Figure S1 XRD patterns for SrMg<sub>2</sub>Bi<sub>2</sub> kept in air for 0 and 1 day.
